# Supplementary material for: Unique ZnII coordination entanglement networks with a flexible fluorinated bis-pyridinecarboxamide tecton and benzenedicarboxylates
Source: Royal Society of Chemistry journal article supplement (doi:10.1039/c0cc03173a), 2010-01-01
Supplement: c0cc03173a.pdf [file c0cc03173a.pdf]

***Electronic Supplementary Information for Chem. Commun.***

**Unique Zn<sup>II</sup> coordination entanglement networks with a flexible fluorinated bis-pyridinecarboxamide tecton and benzenedicarboxylates**

Zhi-Hui Zhang,<sup>a</sup> Sheng-Chun Chen,<sup>a</sup> Jin-Ling Mi,<sup>a</sup> Ming-Yang He,<sup>a</sup> Qun Chen,<sup>\*a</sup> and Miao Du<sup>\*b</sup>

<sup>a</sup> Key Laboratory of Fine Petrochemical Technology, Changzhou University, Changzhou 213164, P. R. China.

E-mail: chenqunjpu@yahoo.com

<sup>b</sup> College of Chemistry, Tianjin Key Laboratory of Structure and Performance for Functional Molecule, Tianjin Normal University, Tianjin 300387, P. R. China. E-mail: dumiao@public.tpt.tj.cn

**Experimental section**

**General methods**

With the exception of the ligand H<sub>2</sub>tfpbbp, which was prepared according to the literature procedure,<sup>1</sup> all reagents and solvents for synthesis and analysis were commercially available and used as received. Infrared spectra were recorded on a Nicole ESP 460 FT-IR spectrometer (KBr pellets) in the range of 4000–600 cm<sup>-1</sup>. C, H and N analyses were performed on a PE-2400 II (Perkin-Elmer) analyzer. Luminescent spectra in the solid state were recorded on a Varian Cary Eclipse spectrometer. Thermogravimetric analysis (TGA) experiments were performed by using a Dupont thermal analyzer from room temperature to 800 °C under a N<sub>2</sub> atmosphere at a heating rate of 10 °C /min. Powder X-ray diffraction (PXRD) patterns were taken on a Rigaku D/max-2500 diffractometer at 60 kV and 300 mA for Cu K $\alpha$  radiation ( $\lambda$ = 1.5406 Å), with a scan speed of 2°/min and a step size of 0.02° in a 2 $\theta$  range of 3.00–50.00°.

**Synthesis**

Complexes **1–4** were similarly synthesized by a typical procedure as described below.

Preparation of **1**: A mixture of Zn(OAc)<sub>2</sub>·2H<sub>2</sub>O (22.0 mg, 0.1 mmol), H<sub>2</sub>tfpbbp (41.8 mg, 0.1 mmol), H<sub>2</sub>ip (16.6 mg, 0.1 mmol), and water (7 mL) was placed into a Teflon-lined stainless steel vessel (20 mL), which was heated to 160 °C for 24 h and subsequently cooled to room temperature at a rate of 2 °C/h. Colorless block crystals of **1** were obtained.

[Zn<sub>2</sub>(H<sub>2</sub>tfpbbp)(ip)<sub>2</sub>(H<sub>2</sub>O)<sub>2</sub>]<sub>n</sub> (**1**). Yield: 20.6 mg (45%, based on Zn<sup>II</sup>). Anal. Calcd for C<sub>18</sub>H<sub>13</sub>F<sub>2</sub>N<sub>2</sub>O<sub>6</sub>Zn: C, 47.34; H, 2.87; N, 6.13%. Found: C, 47.30; H, 2.83; N, 6.15%. IR (cm<sup>-1</sup>): 3313s, 1646vs, 1595w, 1542s, 1492s, 1448m, 1408m, 1374m, 1315s, 1290m, 1236w, 1066s, 1026s, 845w, 687s.

[Zn<sub>2</sub>(H<sub>2</sub>tfpbbp)(mip)<sub>2</sub>(H<sub>2</sub>O)<sub>2</sub>]<sub>n</sub> (**2**). Yield: 23.5 mg (50%, based on Zn<sup>II</sup>). Anal. Calcd for C<sub>19</sub>H<sub>15</sub>F<sub>2</sub>N<sub>2</sub>O<sub>6</sub>Zn: C, 48.48; H, 3.21; N, 5.95%. Found: C, 48.43; H, 3.21; N, 5.99%. IR (cm<sup>-1</sup>): 3313s, 1646vs, 1543s, 1494s, 1446m, 1409w, 1370m, 1314s, 1233w, 1064s, 1028s, 756w, 727w, 685s.

{[Zn(H<sub>2</sub>tfpbbp)(fip)]·H<sub>2</sub>O}<sub>n</sub> (**3**). Yield: 30.8 mg (45%). Anal. Calcd for C<sub>28</sub>H<sub>19</sub>F<sub>5</sub>N<sub>4</sub>O<sub>7</sub>Zn: C, 49.18; H, 2.80; N, 8.19%. Found: C, 49.15; H, 2.85; N, 8.33%. IR (cm<sup>-1</sup>): 3446s, 3282s, 3091m, 1670vs, 1630s, 1587w, 1554s, 1490s, 1421w, 1376m, 1310vs, 1238w, 1064s, 1031w, 959w, 853w, 770w, 733m, 689s.

{[Zn<sub>2</sub>(H<sub>2</sub>tfpbbp)<sub>2</sub>(nip)<sub>2</sub>]·H<sub>2</sub>O}<sub>n</sub> (**4**). Yield: 25.3 mg (36%). Anal. Calcd for C<sub>56</sub>H<sub>36</sub>F<sub>8</sub>N<sub>10</sub>O<sub>17</sub>-Zn<sub>2</sub>: C, 47.91; H, 2.58; N, 9.98%. Found: C, 47.94; H, 2.56; N, 9.97%. IR (cm<sup>-1</sup>): 3449w, 3306s, 3065m, 1647vs, 1539s, 1487s, 1411w, 1342w, 1308vs, 1170w, 1064s, 1014w, 849w, 764w, 730m, 687m.

### Luminescence study

To explore the potential applications as luminescent materials, solid-state fluorescent properties for **1–4** and the free H<sub>2</sub>tfpbbp ligand (Fig. S6) were studied at room temperature. The H<sub>2</sub>tfpbbp ligand displays emissions in the range of 415–525 nm peaking at *ca.* 435 and 500 nm (upon excitation at 335 nm). The Zn<sup>II</sup> complexes **1–3** show the broad emission bands (from 360 to 550 nm) with shoulder peaks, upon excitation at 335–337 nm (Fig. S7), indi-

cating the blue shifts comparing with that of H<sub>2</sub>tfpbbp. Luminescence quench is observed for **4**. Complex **1** has a very broad blue emission band with  $\lambda_{\text{max}}$  of 470 nm, which is similar to that of the free ligand. While the maximum emissions of **2** and **3** are similarly observed at 440 and 418 nm, respectively, which are in the blue region and result in visible luminescence.

**Reference:**

- 1 S.-C. Chen, M.-Y. He, K. Yan, Q. Chen, Y. Guo and Y.-F. Zhang, *Inorg. Chem. Commun.*, 2007, **10**, 451.

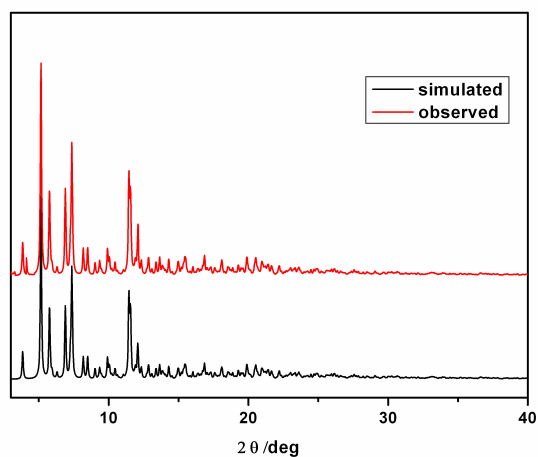

(a)

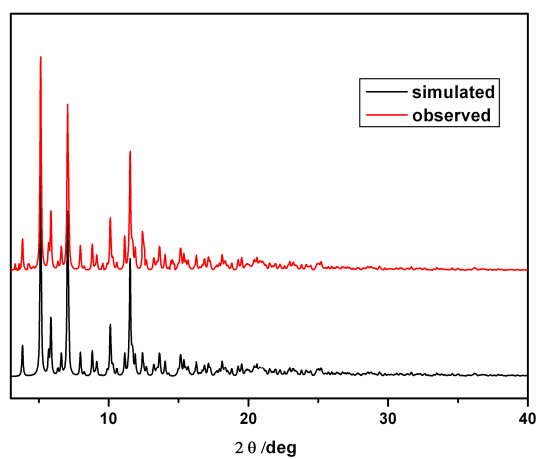

(b)

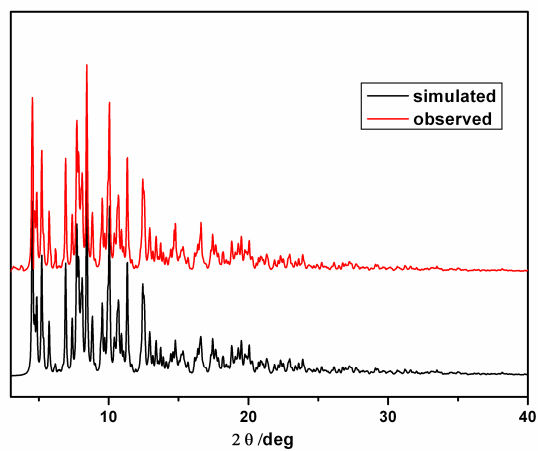

(c)

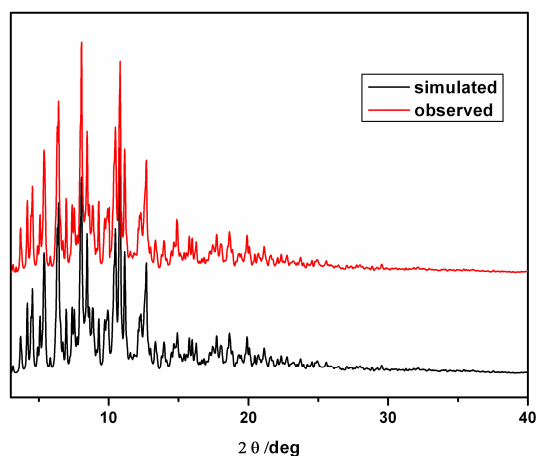

(d)

Fig. S1 Powder X-ray diffraction (PXRD) patterns for complexes 1–4 (a–d).

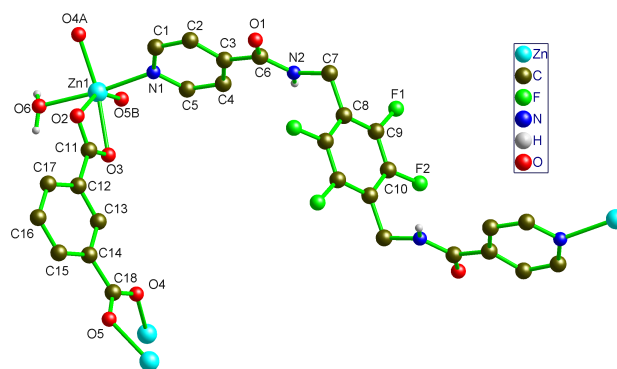

(a)

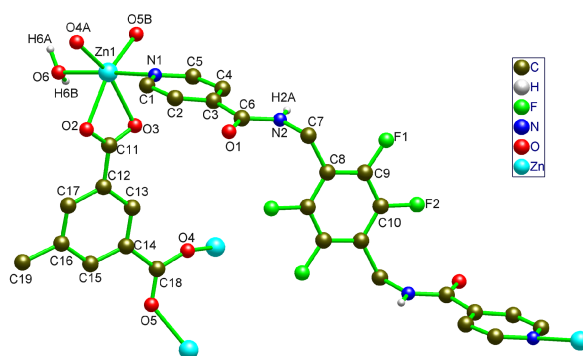

(b)

Fig. S2 A portion view of 1 (a) and 2 (b) with labeling of the asymmetric atoms. Symmetry codes: A =  $x - 1, -y - 1/2, z + 3/2$ ; B =  $-x + 1, y + 1/2, -z + 3/2$ .

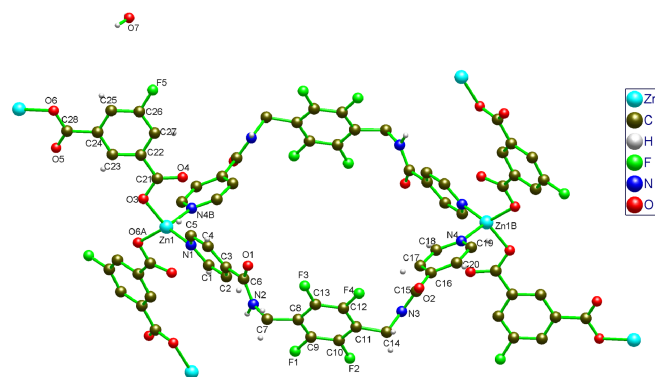

(a)

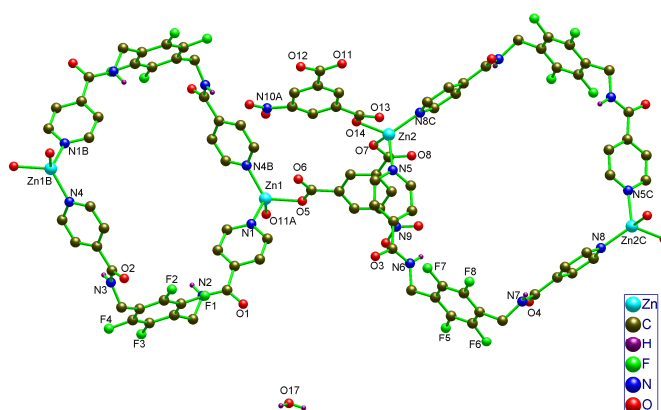

(b)

**Fig. S3** A portion view of **3** (a) and **4** (b) with labeling of the asymmetric atoms. Symmetry codes: A =  $x, -y + 1/2, z - 1/2$ ; B =  $-x + 1, -y + 2, -z + 1$  for **3**. A =  $x, y - 1, z$ ; B =  $-x + 2, -y, -z + 2$ ; C =  $-x - 1, -y + 1, -z + 2$  for **4**.

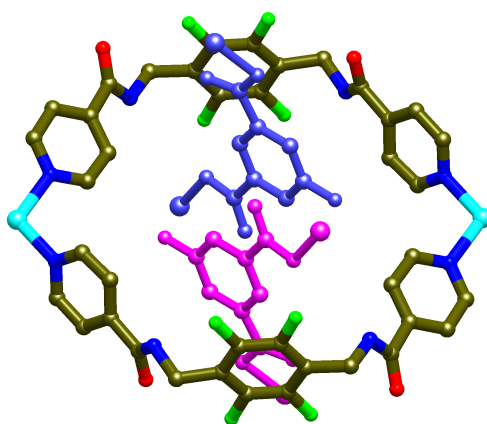

**Fig. S4** View of **3** showing the threading of two fip spacers into the  $Zn_2(H_2fipbbp)_2$  loop.

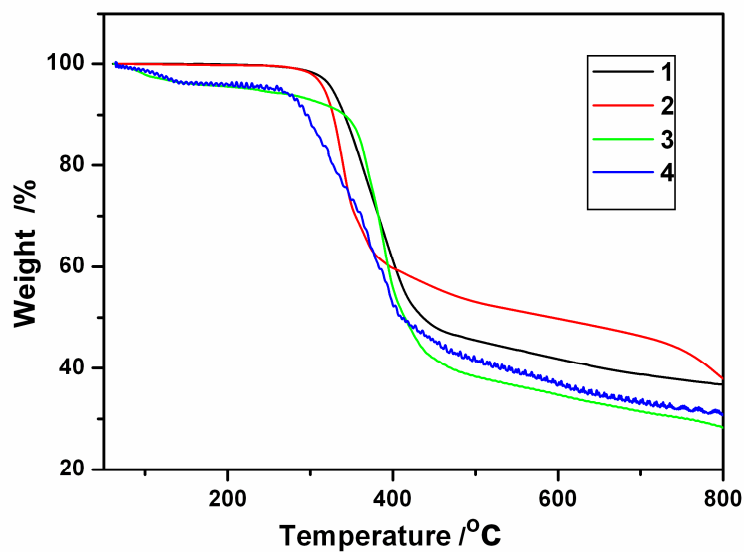

Fig. S5 TGA curves of complexes 1–4.

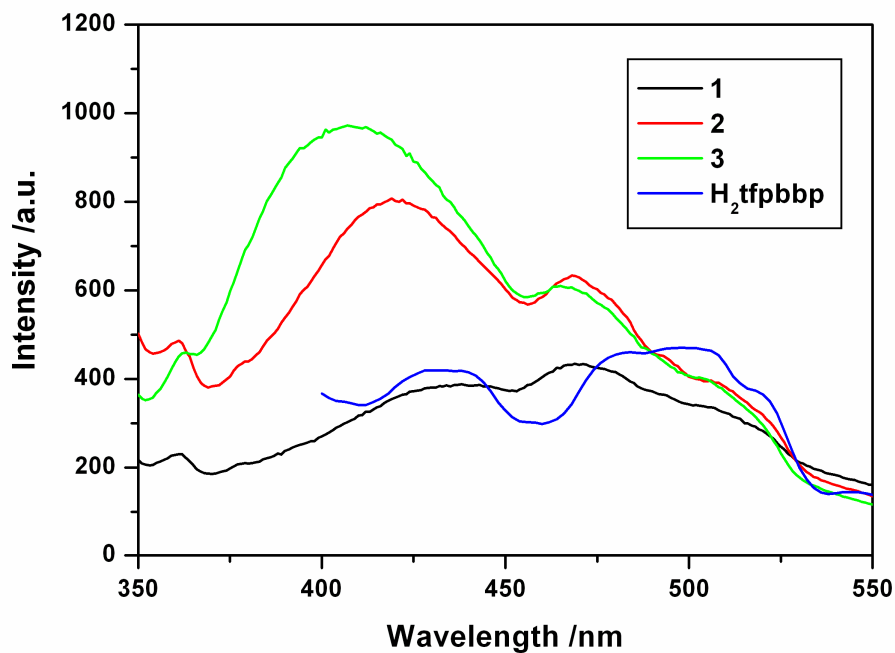

Fig. S6 Solid state emission spectra of 1–3 and H<sub>2</sub>tfpbbp.

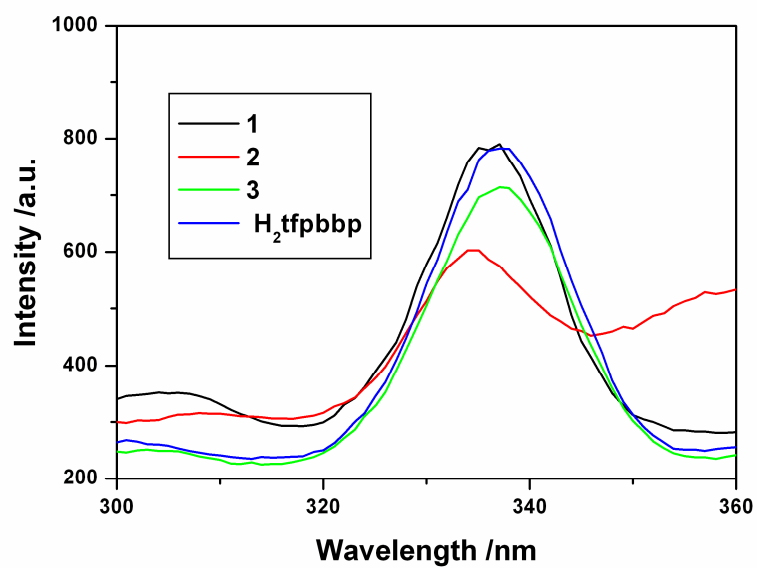

**Fig. S7** Solid state excitation spectra of 1–4 and the free H<sub>2</sub>tfpbbp ligand.



**Table S1** Crystallographic data and structure refinement for complexes **1–4**.

| Complex                                                    | <b>1</b>                                                                        | <b>2</b>                                                                        | <b>3</b>                                                                        | <b>4</b>                                                                                       |
|------------------------------------------------------------|---------------------------------------------------------------------------------|---------------------------------------------------------------------------------|---------------------------------------------------------------------------------|------------------------------------------------------------------------------------------------|
| formula                                                    | C <sub>18</sub> H <sub>13</sub> F <sub>2</sub> N <sub>2</sub> O <sub>6</sub> Zn | C <sub>19</sub> H <sub>15</sub> F <sub>2</sub> N <sub>2</sub> O <sub>6</sub> Zn | C <sub>28</sub> H <sub>19</sub> F <sub>5</sub> N <sub>4</sub> O <sub>7</sub> Zn | C <sub>56</sub> H <sub>36</sub> F <sub>8</sub> N <sub>10</sub> O <sub>17</sub> Zn <sub>2</sub> |
| <i>Mr</i>                                                  | 456.69                                                                          | 470.70                                                                          | 683.84                                                                          | 1403.69                                                                                        |
| cryst system                                               | monoclinic                                                                      | monoclinic                                                                      | monoclinic                                                                      | triclinic                                                                                      |
| space group                                                | <i>P</i> 2 <sub>1</sub> / <i>c</i>                                              | <i>P</i> 2 <sub>1</sub> / <i>c</i>                                              | <i>P</i> 2 <sub>1</sub> / <i>c</i>                                              | <i>P</i> $\bar{1}$                                                                             |
| <i>a</i> [Å]                                               | 8.0683(8)                                                                       | 8.2753(9)                                                                       | 16.511(4)                                                                       | 11.738(2)                                                                                      |
| <i>b</i> [Å]                                               | 15.9656(16)                                                                     | 16.4858(18)                                                                     | 11.031(3)                                                                       | 16.567(3)                                                                                      |
| <i>c</i> [Å]                                               | 14.4286(15)                                                                     | 14.4799(16)                                                                     | 16.949(4)                                                                       | 16.799(3)                                                                                      |
| $\alpha$ [°]                                               | 90                                                                              | 90                                                                              | 90                                                                              | 73.420(2)                                                                                      |
| $\beta$ [°]                                                | 101.8500(10)                                                                    | 106.4530(10)                                                                    | 112.683(3)                                                                      | 70.116(2)                                                                                      |
| $\gamma$ [°]                                               | 90                                                                              | 90                                                                              | 90                                                                              | 85.726(2)                                                                                      |
| <i>V</i> [Å <sup>3</sup> ]                                 | 1819.0(3)                                                                       | 1894.5(4)                                                                       | 2848.4(12)                                                                      | 2943.3(10)                                                                                     |
| <i>Z</i>                                                   | 4                                                                               | 4                                                                               | 4                                                                               | 2                                                                                              |
| $\rho_{\text{calcd}}$ [g·cm <sup>-3</sup> ]                | 1.668                                                                           | 1.650                                                                           | 1.595                                                                           | 1.584                                                                                          |
| $\mu$ [mm <sup>-1</sup> ]                                  | 1.410                                                                           | 1.357                                                                           | 0.949                                                                           | 0.921                                                                                          |
| <i>F</i> (000)                                             | 924                                                                             | 956                                                                             | 1384                                                                            | 1420                                                                                           |
| total/independent reflns                                   | 15407/4162                                                                      | 14768/3719                                                                      | 20033/5005                                                                      | 22423/10886                                                                                    |
| parameters                                                 | 262                                                                             | 272                                                                             | 406                                                                             | 866                                                                                            |
| <i>R</i> <sub>int</sub>                                    | 0.0322                                                                          | 0.0529                                                                          | 0.0227                                                                          | 0.0353                                                                                         |
| <i>R</i> <sup>a</sup> , <i>R</i> <sub>w</sub> <sup>b</sup> | 0.0268, 0.0720                                                                  | 0.0506, 0.1091                                                                  | 0.0266, 0.0698                                                                  | 0.0509, 0.1338                                                                                 |
| GOF                                                        | 1.062                                                                           | 0.944                                                                           | 1.033                                                                           | 1.080                                                                                          |
| residuals [e Å <sup>-3</sup> ]                             | 0.344, -0.511                                                                   | 0.327, -0.571                                                                   | 0.300, -0.252                                                                   | 1.087, -1.374                                                                                  |

<sup>a</sup>  $R = \Sigma ||F_o| - |F_c|| / \Sigma |F_o|$ . <sup>b</sup>  $R_w = [\Sigma [w(F_o^2 - F_c^2)^2] / \Sigma w(F_o^2)^2]^{1/2}$ .

**Table S2** Selected bond distances (Å) and angles (°) for complexes **1–4**.

| <b>1</b>                |            | <b>2</b>                |            |
|-------------------------|------------|-------------------------|------------|
| Zn1–O2                  | 2.2197(13) | Zn1–O2                  | 2.143(3)   |
| Zn1–O3                  | 2.2147(13) | Zn1–O3                  | 2.274(3)   |
| Zn1–O6                  | 2.1380(13) | Zn1–O6                  | 2.179(3)   |
| Zn1–N1                  | 2.1202(14) | Zn1–N1                  | 2.128(3)   |
| Zn1–O5 <sup>i</sup>     | 2.0395(12) | Zn1–O5 <sup>i</sup>     | 2.018(3)   |
| Zn1–O4 <sup>ii</sup>    | 2.0558(12) | Zn1–O4 <sup>ii</sup>    | 2.041(2)   |
| O2–Zn1–O3               | 59.01(5)   | O2–Zn1–O3               | 59.52(9)   |
| O2–Zn1–O6               | 84.50(5)   | O2–Zn1–O6               | 81.55(10)  |
| O2–Zn1–N1               | 95.26(5)   | O2–Zn1–N1               | 95.35(11)  |
| O2–Zn1–O5 <sup>i</sup>  | 152.01(5)  | O2–Zn1–O5 <sup>i</sup>  | 151.70(10) |
| O2–Zn1–O4 <sup>ii</sup> | 96.82(5)   | O2–Zn1–O4 <sup>ii</sup> | 98.23(10)  |
| O3–Zn1–O6               | 90.89(5)   | O3–Zn1–O6               | 92.41(10)  |
| O3–Zn1–N1               | 94.19(5)   | O3–Zn1–N1               | 86.91(10)  |
| O3–Zn1–O5 <sup>i</sup>  | 93.25(5)   | O3–Zn1–O5 <sup>i</sup>  | 94.08(10)  |

|                                        |            |                                                                       |                       |
|----------------------------------------|------------|-----------------------------------------------------------------------|-----------------------|
| O3–Zn1–O4 <sup>ii</sup>                | 155.79(5)  | O3–Zn1–O4 <sup>ii</sup>                                               | 156.78(10)            |
| O6–Zn1–N1                              | 173.93(5)  | O6–Zn1–N1                                                             | 176.71(11)            |
| O5 <sup>i</sup> –Zn1–O6                | 92.96(5)   | O5 <sup>i</sup> –Zn1–O6                                               | 90.30(10)             |
| O4 <sup>ii</sup> –Zn1–O6               | 87.77(5)   | O4 <sup>ii</sup> –Zn1–O6                                              | 90.45(10)             |
| O5 <sup>i</sup> –Zn1–N1                | 90.08(5)   | O5 <sup>i</sup> –Zn1–N1                                               | 92.95(11)             |
| O4 <sup>ii</sup> –Zn1–N1               | 86.24(5)   | O4 <sup>ii</sup> –Zn1–N1                                              | 88.92(11)             |
| O4 <sup>ii</sup> –Zn1–O5 <sup>i</sup>  | 110.96(5)  | O4 <sup>ii</sup> –Zn1–O5 <sup>i</sup>                                 | 108.95(10)            |
| <b>3</b>                               |            | <b>4</b>                                                              |                       |
| Zn1–O3                                 | 1.9598(14) | Zn1–O5/Zn2–O7                                                         | 1.973(4)/1.997(3)     |
| Zn1–N1                                 | 2.0372(17) | Zn1–N1/Zn2–N5                                                         | 2.045(3)/2.047(3)     |
| Zn1–N4 <sup>i</sup>                    | 2.0579(18) | Zn1–O11 <sup>i</sup> /Zn2–O14                                         | 1.978(3)/1.960(4)     |
| Zn1–O6 <sup>ii</sup>                   | 1.9914(14) | Zn1–N4 <sup>ii</sup> /Zn2–N8 <sup>iii</sup>                           | 2.022(3)/2.015(4)     |
| Zn1–O5 <sup>ii</sup>                   | 2.602(2)   | Zn1–O12 <sup>i</sup> /Zn2–O13                                         | 2.778(3)/2.695(4)     |
| O3–Zn1–N1                              | 109.70(6)  | O5–Zn1–N1/<br>O7–Zn2–N5                                               | 105.33(14)/95.81(13)  |
| O3–Zn1–N4 <sup>i</sup>                 | 109.31(7)  | O5–Zn1–N4 <sup>ii</sup> /<br>O7–Zn2–N8 <sup>iii</sup>                 | 122.44(13)/119.93(14) |
| O3–Zn1–O5 <sup>ii</sup>                | 150.40(6)  | O5–Zn1–O11 <sup>i</sup> /<br>O7–Zn2–O14                               | 91.21(14)/92.24(15)   |
| O3–Zn1–O6 <sup>ii</sup>                | 97.51(5)   | O5–Zn1–O12 <sup>i</sup> /<br>O7–Zn2–O13                               | 141.80(11)/145.37(14) |
| N1–Zn1–N4 <sup>i</sup>                 | 107.73(6)  | N1–Zn1–N4 <sup>ii</sup> /<br>N5–Zn2–N8 <sup>iii</sup>                 | 111.22(14)/116.45(14) |
| O5 <sup>ii</sup> –Zn1–N1               | 85.85(6)   | O11 <sup>i</sup> –Zn1–N1/<br>O14–Zn2–N5                               | 110.04(13)/106.36(17) |
| O6 <sup>ii</sup> –Zn1–N1               | 131.31(7)  | O12 <sup>i</sup> –Zn1–N1/<br>O13–Zn2–N5                               | 81.29(12)/89.28(14)   |
| O5 <sup>ii</sup> –Zn1–N4 <sup>i</sup>  | 88.36(7)   | O11 <sup>i</sup> –Zn1–N4 <sup>ii</sup> /<br>O14–Zn2–N8 <sup>iii</sup> | 114.71(14)/121.06(16) |
| O6 <sup>ii</sup> –Zn1–N4 <sup>i</sup>  | 99.72(6)   | O12 <sup>i</sup> –Zn1–N4 <sup>ii</sup> /<br>O13–Zn2–N8 <sup>iii</sup> | 87.51(12)/87.35(13)   |
| O5 <sup>ii</sup> –Zn1–O6 <sup>ii</sup> | 55.12(5)   | O11 <sup>i</sup> –Zn1–O12 <sup>i</sup> /<br>O13–Zn2–O14               | 52.29(11)/53.69(14)   |

Symmetry codes for **1**: (i)  $-x + 1, y + 1/2, -z + 3/2$ ; (ii)  $x, -y + 3/2, z + 1/2$ . For **2**: (i)  $-x + 1, y + 1/2, -z + 3/2$ ; (ii)  $x, -y + 1/2, z - 1/2$ . For **3**: (i)  $-x + 1, -y + 2, -z + 1$ ; (ii)  $x, -y + 1/2, z - 1/2$ . For **4**: (i)  $x, y - 1, z$ ; (ii)  $-x + 2, -y, -z + 2$ ; (iii)  $-x - 1, -y + 1, -z + 2$ .

**Table S3** Possible hydrogen-bonding geometries (Å, °) for complexes **1–4**.

| D–H...A                     | D–H  | H...A (Å) | D...A (Å) | D–H...A (°) |
|-----------------------------|------|-----------|-----------|-------------|
| <b>1</b>                    |      |           |           |             |
| N2–H2A...O2 <sup>iii</sup>  | 0.86 | 2.01      | 2.843(2)  | 164         |
| O6–H6A...O1 <sup>iv</sup>   | 0.82 | 1.84      | 2.658(2)  | 171         |
| O6–H6B...O4 <sup>i</sup>    | 0.82 | 2.24      | 2.927(2)  | 141         |
| C1–H1...O4 <sup>ii</sup>    | 0.93 | 2.52      | 3.016(2)  | 114         |
| C4–H4...O2 <sup>iii</sup>   | 0.93 | 2.30      | 3.214(2)  | 166         |
| C7–H7A...O1                 | 0.97 | 2.43      | 2.824(3)  | 104         |
| C7–H7B...F1                 | 0.97 | 2.48      | 2.875(3)  | 104         |
| <b>2</b>                    |      |           |           |             |
| N2–H2A...O2 <sup>iii</sup>  | 0.86 | 2.05      | 2.871(4)  | 160         |
| O6–H6A...O4 <sup>i</sup>    | 0.85 | 2.36      | 2.918(4)  | 123         |
| O6–H6A...O5 <sup>ii</sup>   | 0.85 | 2.55      | 3.123(4)  | 125         |
| O6–H6B...O1 <sup>iv</sup>   | 0.85 | 1.91      | 2.692(4)  | 153         |
| C2–H2...O1                  | 0.93 | 2.41      | 2.731(4)  | 100         |
| C4–H4...O2 <sup>iii</sup>   | 0.93 | 2.55      | 3.450(5)  | 162         |
| C7–H7A...O1                 | 0.97 | 2.37      | 2.781(5)  | 105         |
| C7–H7B...F1                 | 0.97 | 2.49      | 2.895(5)  | 105         |
| C19–H19A...F2 <sup>v</sup>  | 0.96 | 2.49      | 2.880(5)  | 105         |
| <b>3</b>                    |      |           |           |             |
| O7–H7AA...O2 <sup>i</sup>   | 0.82 | 2.01      | 2.828(3)  | 174         |
| O7–H7AB...O1 <sup>ii</sup>  | 0.82 | 2.58      | 3.398(3)  | 179         |
| N2–H2A...O7 <sup>iii</sup>  | 0.86 | 2.20      | 3.035(3)  | 164         |
| N3–H3A...O6 <sup>iv</sup>   | 0.86 | 2.11      | 2.936(2)  | 162         |
| C1–H1...O5 <sup>v</sup>     | 0.93 | 2.38      | 3.037(3)  | 127         |
| C7–H7A...F2 <sup>vi</sup>   | 0.97 | 2.53      | 3.485(3)  | 166         |
| C7–H7B...F3                 | 0.97 | 2.48      | 2.880(3)  | 105         |
| C7–H7B...O1                 | 0.97 | 2.39      | 2.759(3)  | 102         |
| C14–H14A...O2               | 0.97 | 2.48      | 2.839(3)  | 102         |
| C14–H14B...F2               | 0.97 | 2.47      | 2.840(3)  | 102         |
| C18–H18...F5 <sup>iii</sup> | 0.93 | 2.47      | 3.257(3)  | 142         |
| C20–H20...O4 <sup>vii</sup> | 0.93 | 2.42      | 3.137(3)  | 133         |
| <b>4</b>                    |      |           |           |             |
| N2–H2A...O7 <sup>i</sup>    | 0.86 | 2.27      | 3.008(5)  | 145         |
| N3–H3...O17 <sup>ii</sup>   | 0.86 | 2.06      | 2.879(5)  | 158         |
| N6–H6...O5 <sup>iii</sup>   | 0.86 | 2.32      | 2.998(6)  | 136         |
| N7–H7...O2 <sup>iv</sup>    | 0.86 | 2.12      | 2.932(5)  | 157         |
| O17–H17A...O8 <sup>v</sup>  | 0.82 | 2.00      | 2.813(5)  | 172         |
| O17–H17B...O1 <sup>vi</sup> | 0.82 | 2.02      | 2.838(5)  | 171         |

|                             |      |      |           |     |
|-----------------------------|------|------|-----------|-----|
| C5–H5…O12 <sup>vii</sup>    | 0.93 | 2.54 | 2.993(6)  | 111 |
| C7–H7A…O1                   | 0.97 | 2.37 | 2.781(6)  | 105 |
| C7–H7B…F3                   | 0.97 | 2.40 | 2.850(6)  | 108 |
| C14–H14A…F4                 | 0.97 | 2.45 | 2.860(6)  | 105 |
| C14–H14B…O2                 | 0.97 | 2.36 | 2.783(6)  | 105 |
| C18–H18…O12 <sup>viii</sup> | 0.93 | 2.37 | 3.104(6)  | 136 |
| C19–H19…O6 <sup>ix</sup>    | 0.93 | 2.29 | 3.087(6)  | 144 |
| C21–H21…O15A <sup>x</sup>   | 0.93 | 2.39 | 3.114(14) | 134 |
| C27–H27A…F5                 | 0.97 | 2.38 | 2.839(7)  | 108 |
| C27–H27B…O3                 | 0.97 | 2.40 | 2.806(7)  | 104 |
| C34–H34A…O3 <sup>xi</sup>   | 0.97 | 2.52 | 3.326(6)  | 140 |
| C34–H34B…F6                 | 0.97 | 2.42 | 2.866(8)  | 107 |
| C37–H37…O2 <sup>iv</sup>    | 0.93 | 2.48 | 3.360(6)  | 157 |
| C38–H38…O8 <sup>xii</sup>   | 0.93 | 2.43 | 3.127(6)  | 132 |
| C39–H39…O13 <sup>xiii</sup> | 0.93 | 2.21 | 2.982(7)  | 140 |
| C40–H40…O3 <sup>x</sup>     | 0.93 | 2.57 | 3.358(7)  | 143 |
| C40–H40…O4                  | 0.93 | 2.42 | 2.738(7)  | 100 |

Symmetry codes for **1**: (i)  $-x + 1, y + 1/2, -z + 3/2$ ; (ii)  $x, -y + 3/2, z + 1/2$ ; (iii)  $x + 1, y, z$ ; (ix)  $x - 1, -y + 3/2, z - 1/2$ . For **2**: (i)  $-x + 1, y + 1/2, -z + 3/2$ ; (ii)  $x, -y + 1/2, z - 1/2$ ; (iii)  $x - 1, y, z$ ; (iv)  $x + 1, -y + 1/2, z + 1/2$ ; (v)  $x + 2, y, z$ . For **3**: (i)  $-x + 1, y - 3/2, -z + 3/2$ ; (ii)  $x - 1, y - 1, z$ ; (iii)  $-x + 1, y + 1/2, -z + 3/2$ ; (iv)  $x, y + 1, z - 1$ ; (v)  $x, -y + 1/2, z - 1/2$ ; (vi)  $-x + 2, -y + 2, -z + 1$ ; (vii)  $x, -y + 5/2, z - 1/2$ . For **4**: (i)  $-x + 1, -y, -z + 2$ ; (ii)  $-x + 2, -y, -z + 1$ ; (iii)  $-x, -y, -z + 2$ ; (iv)  $-x + 1, -y + 1, -z + 1$ ; (v)  $x + 1, y, z - 1$ ; (vi)  $-x + 1, -y, -z + 1$ ; (vii)  $x, y - 1, z$ ; (viii)  $-x + 2, -y + 1, -z + 2$ ; (ix)  $-x + 2, -y, -z + 2$ ; (x)  $x - 1, y, z$ ; (xi)  $-x, -y + 1, -z + 1$ ; (xii)  $-x - 1, -y + 1, -z + 2$ .
